# Supplementary material for: Functionalized carbon dots enable simultaneous bone crack detection and drug deposition
Source: Royal Society of Chemistry journal article supplement (doi:10.1039/c4tb00918e), 2014-01-01
Supplement: c4tb00918e1.pdf [file c4tb00918e1.pdf]

## Functionalized carbon dots enable simultaneous bone crack detection and drug deposition

A. Shanti Krishna<sup>a</sup>, C. Radhakumary<sup>a\*</sup>, Molly Antony<sup>b</sup>, and K. Sreenivasan<sup>a,\*</sup>

<sup>a</sup> Laboratory for Polymer Analysis, Biomedical Technology Wing, Sree Chitra Tirunal Institute for Medical Sciences & Technology, Thiruvananthapuram-695012, India.

<sup>b</sup> Department of Microbiology, Sree Chitra Tirunal Institute for Medical Sciences & Technology, Thiruvananthapuram-695011, India.

\*Phone 091- 471 -2520248, Fax. 091- 471- 2341814. Email: [sreeni@sctimst.ac.in](mailto:sreeni@sctimst.ac.in), [radha.changerath@gmail.com](mailto:radha.changerath@gmail.com)

### Supporting Information

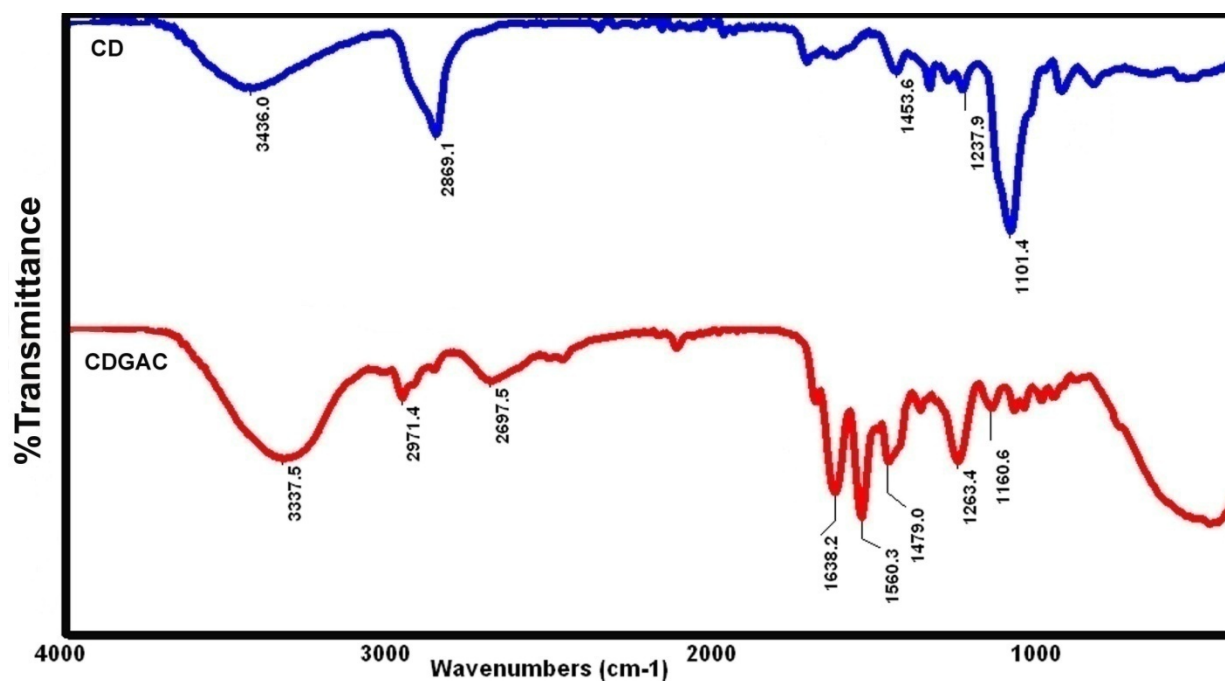

Fig S1. FTIR spectra of CD and CDGAC

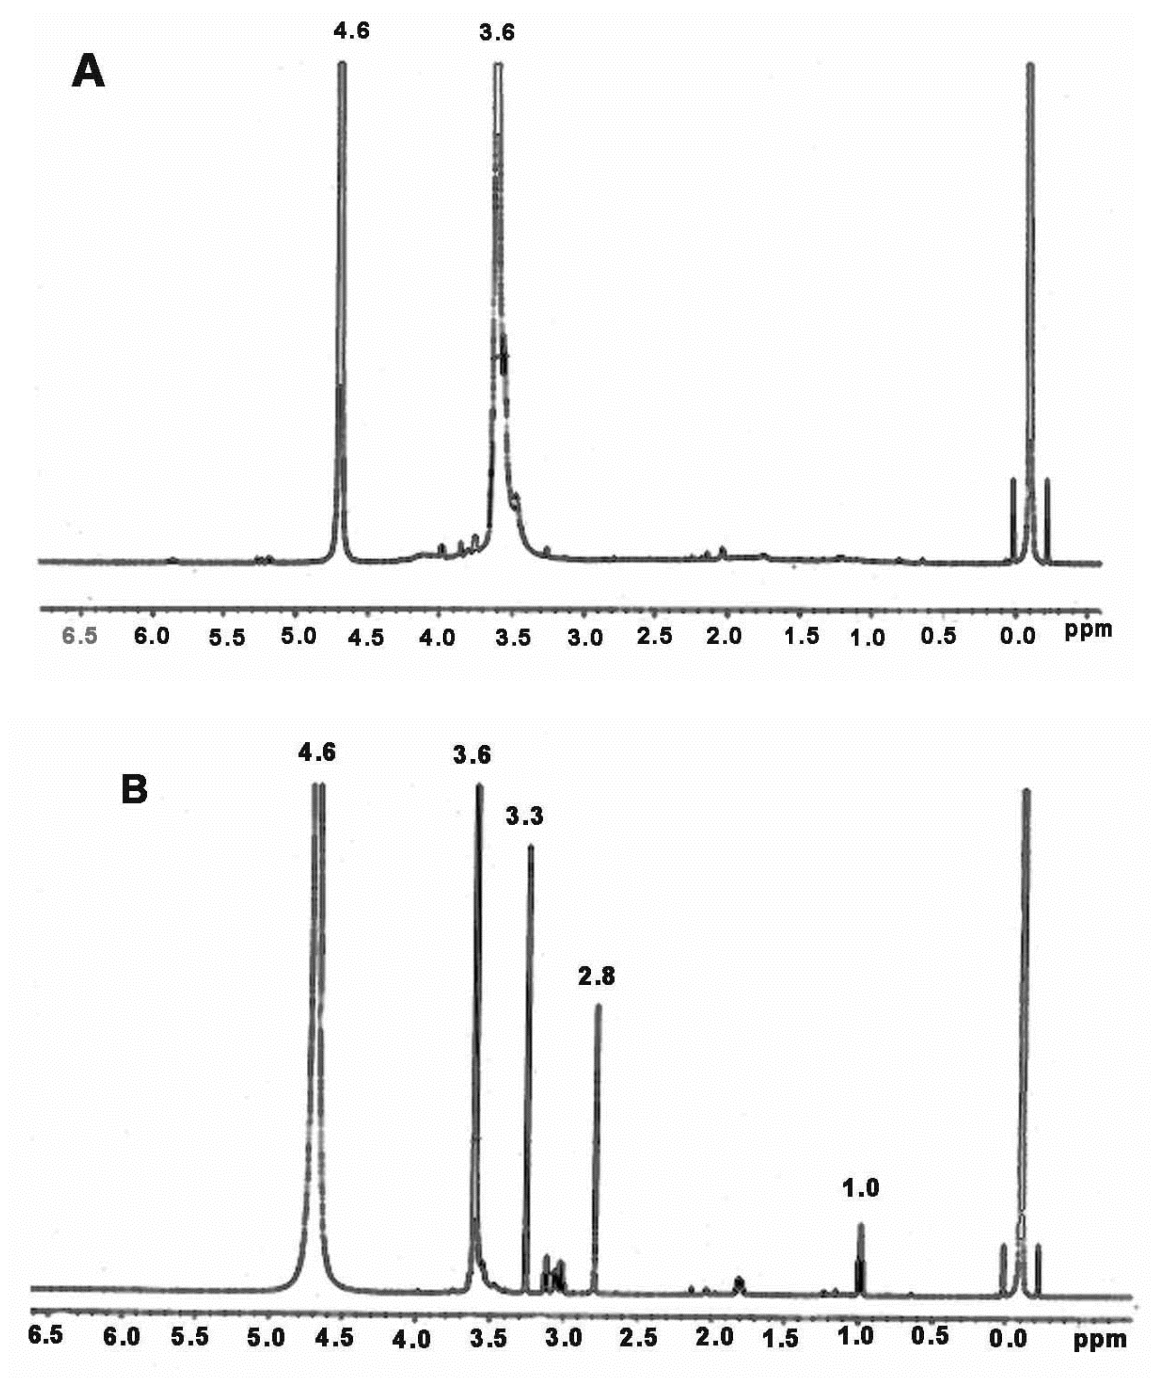

Fig S2.  $^1\text{H}$  NMR spectra of A) CD and B) CDGAC

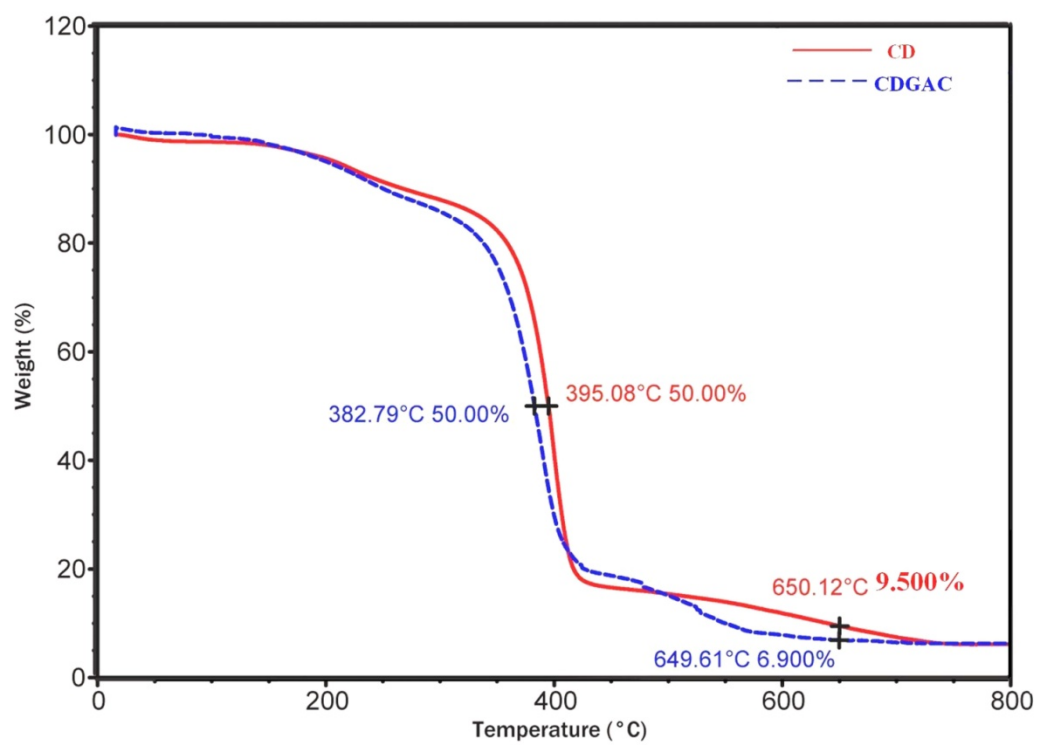

**Fig S3. Thermograms of CD and CDGAC**

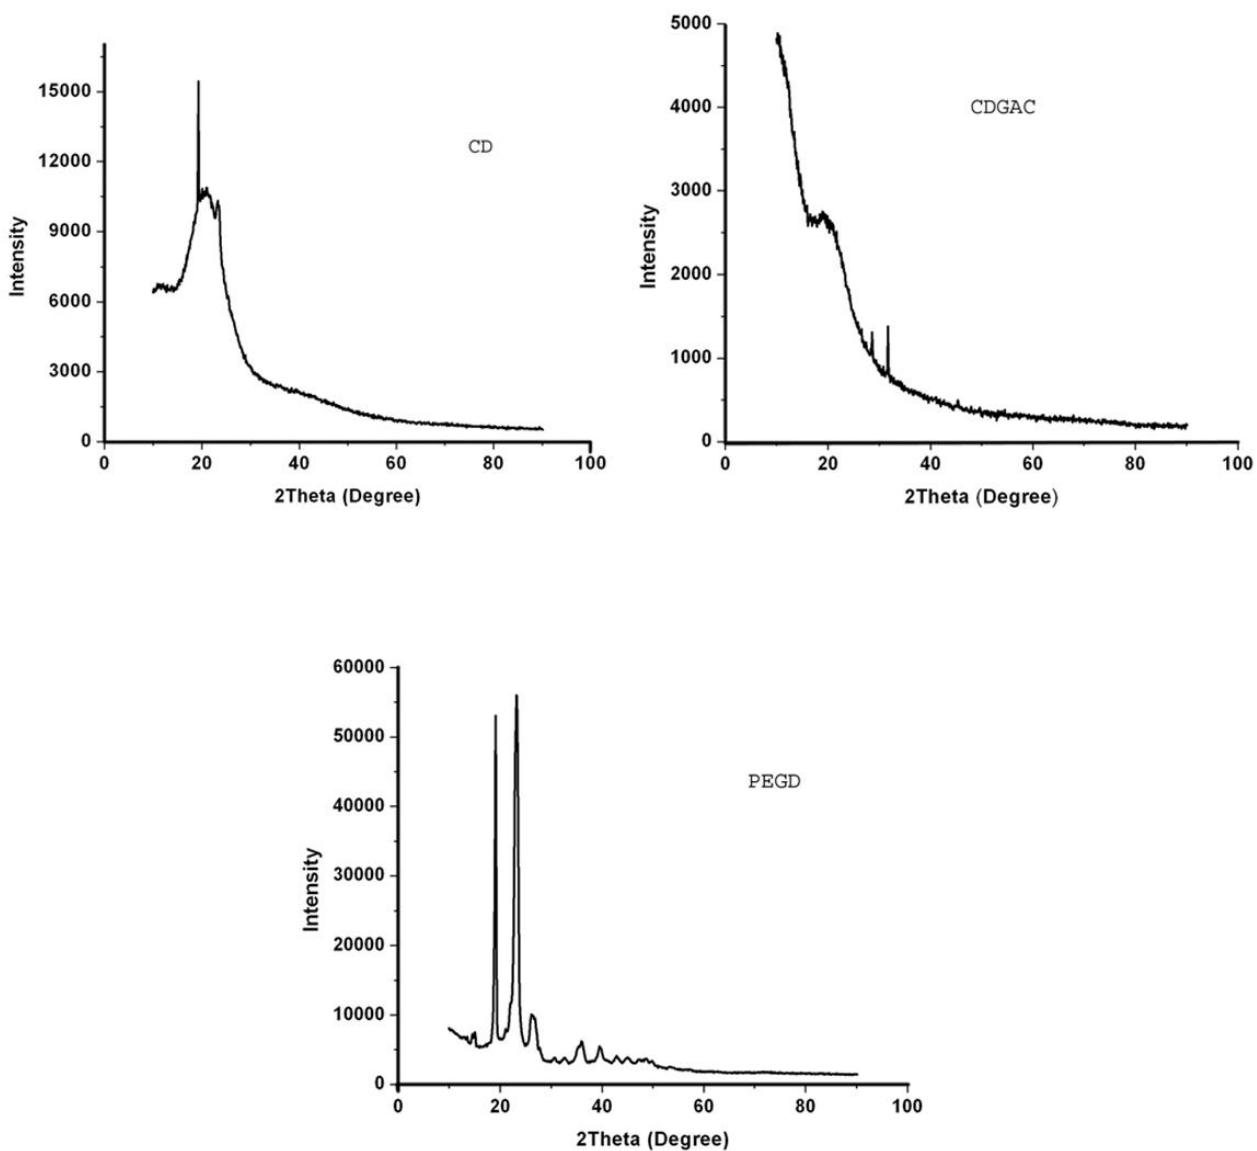

**Fig S4. XRD pattern of CD, CDGAC and PEGD**

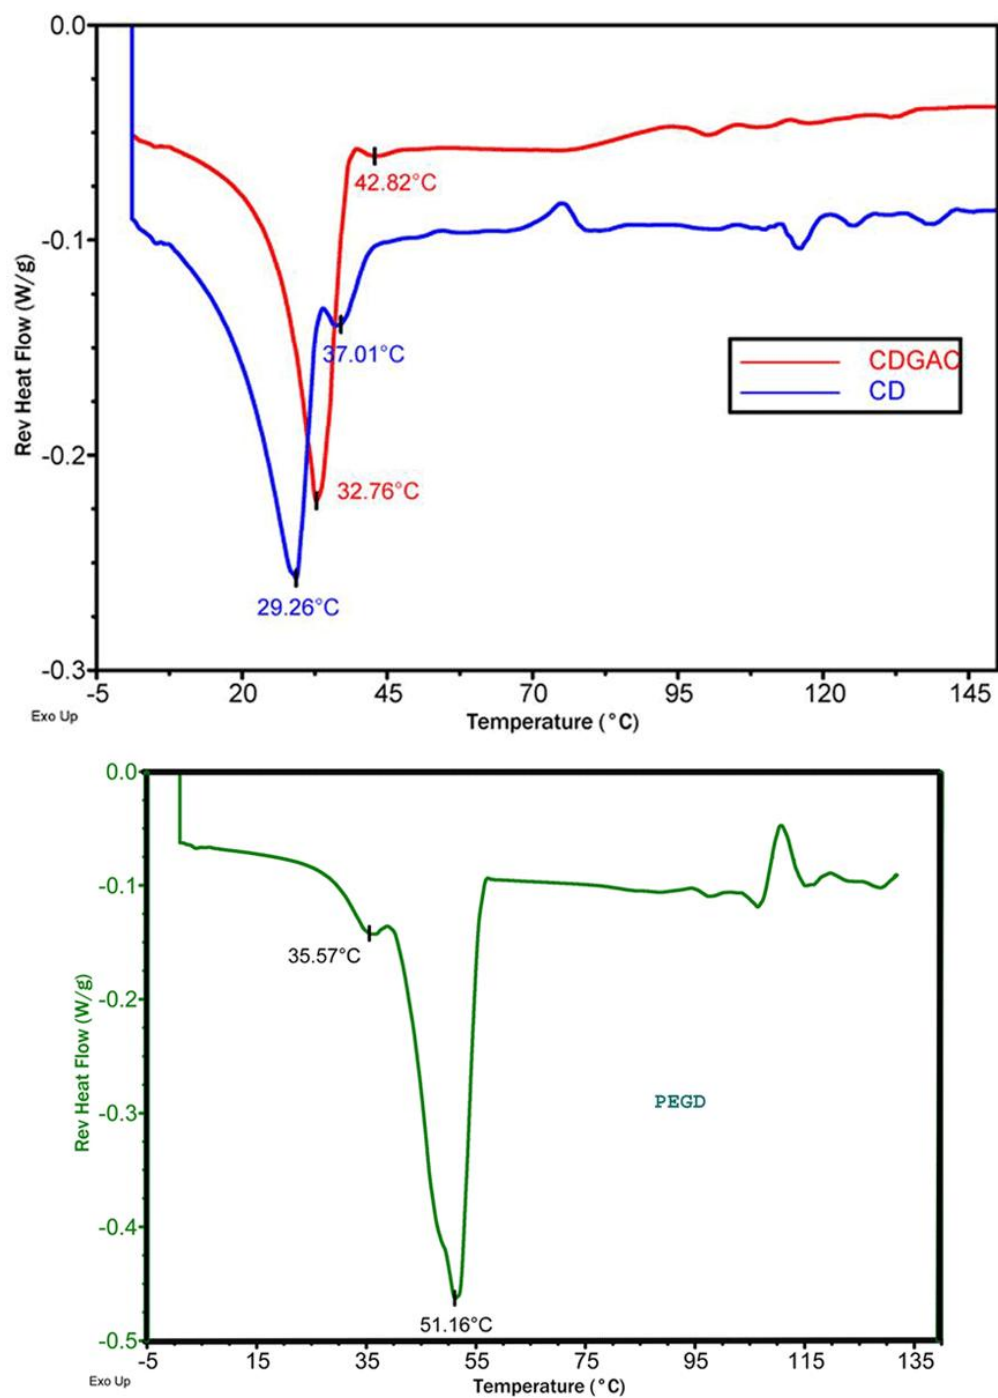

**Fig S5. MDSC curve for CD, CDGAC and PEGD**

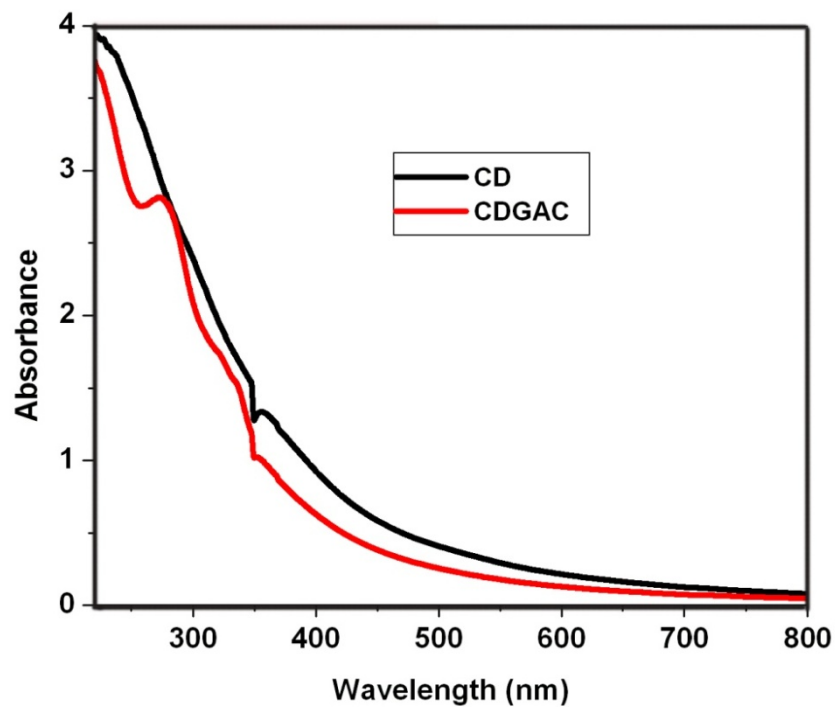

**Fig S6. UV-visible absorbance spectra of CD and CDGAC**

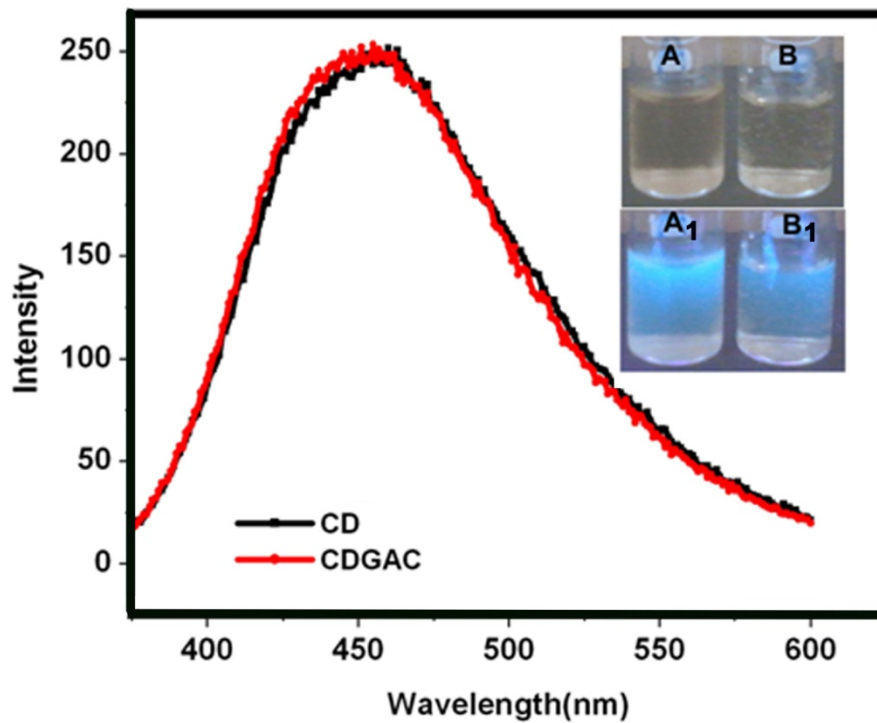

**Fig S7. Fluorescence emission spectra of CD and CDGAC [Inset shows photographic images of CD and CDGAC in day light (A&B) and under UV light (A<sub>1</sub>& B<sub>1</sub>)]**

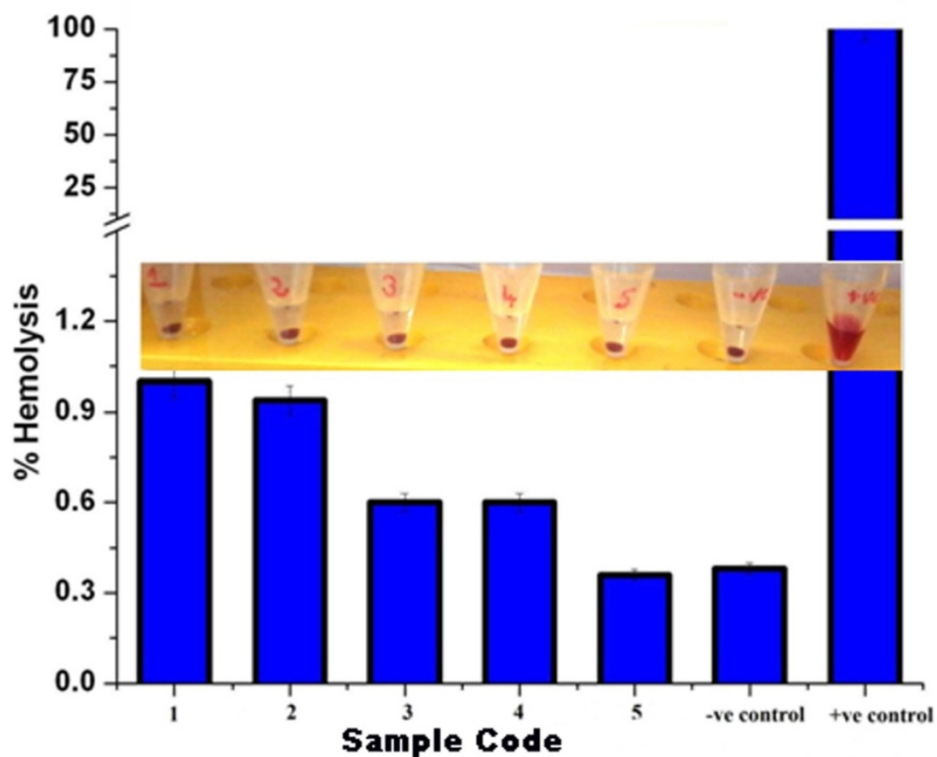

Fig S8. Haemolysis assay for CD and CDGAC (Samples 1, 2, 3, 4 and 5 are CD 1mg/mL, CD 0.5mg/mL, CD 0.25mg/mL, CDGAC 1mg/mL and CDGAC 0.5mg/mL respectively).

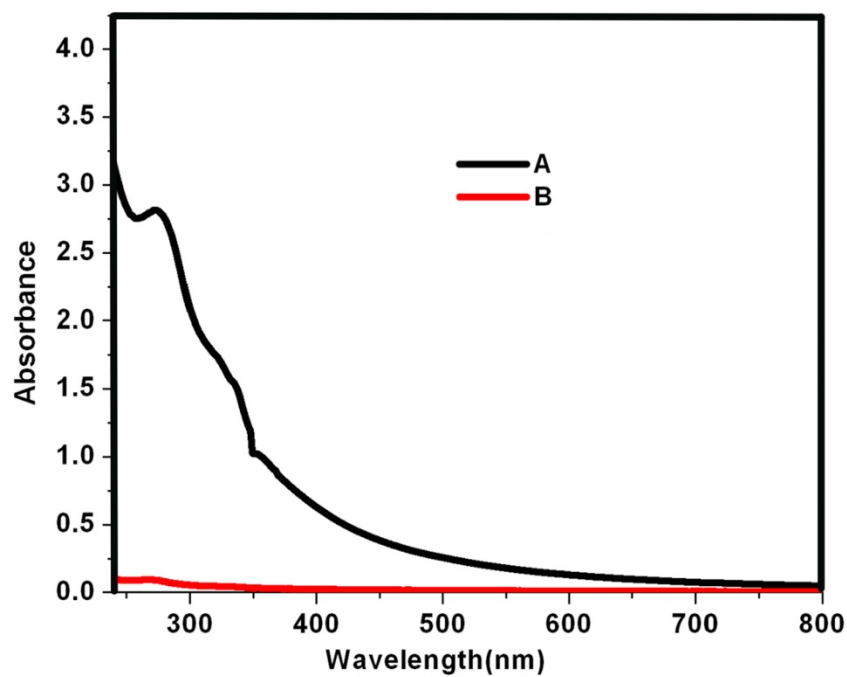

Fig S9. UV-visible absorbance spectra of A) CDGAC B) PBS in which dialysis membrane containing CDGAC was immersed for 24h

**Table: S1 Particle sizes of CD and CDGAC obtained from DLS analysis**

| No | Sample | Particle size (nm) |
|----|--------|--------------------|
| 1  | CD     | 10 ± 3.0           |
| 2  | CDGAC  | 137 ± 7.0          |

**Table S2. Antibacterial assay by MIC method.**

| No  | Concentration (µg/mL) | C | CD              | CDGAC           |
|-----|-----------------------|---|-----------------|-----------------|
| 1.  | 50000                 | - | Scanty growth   | -               |
| 2.  | 25000                 | - | Scanty growth   | -               |
| 3.  | 12500                 | - | Moderate growth | -               |
| 4.  | 6250                  | - | Heavy growth    | -               |
| 5.  | 3125                  | - | Heavy           | -               |
| 6.  | 1560                  | - | Heavy           | -               |
| 7.  | 781                   | - | Heavy           | Moderate growth |
| 8.  | 390                   | - | Heavy           | Heavy           |
| 9.  | 195                   | - | Heavy           | Heavy           |
| 10. | 97                    | - | Heavy           | Heavy           |
| 11. | 48                    | - | Heavy           | Heavy           |
| 12. | 24                    | - | Heavy           | Heavy           |
| 13. | 12                    | - | Heavy           | Heavy           |
| 14. | 6                     | - | Heavy           | Heavy           |
| 15. | 3                     | - | Heavy           | Heavy           |
| 16. | 1.5                   | - | Heavy           | Heavy           |
